# Supplementary material for: Aβ42 as a Biomarker of Alzheimer’s Disease: Is Saliva a Viable Alternative to Cerebrospinal Fluid?
Source: Brain Sci. 2022 Dec 17;12(12):1729. doi: 10.3390/brainsci12121729 (PMC9775629; doi:10.3390/brainsci12121729)
Supplement: Supplementary file 1 [file brainsci-12-01729-s001.zip › brainsci-2057104-supplementary.pdf]

## Supplementary Material

### Supplementary Figures

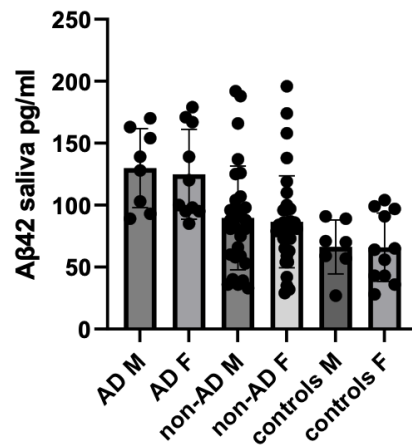

**Supplementary Figure S1.** Comparison of salivary Aβ42 concentrations between males and female in AD, non-AD and controls.

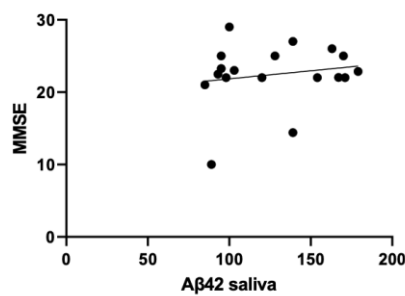

**Supplementary Figure S2.** Correlation between salivary Aβ42 concentrations and MMSE scores in AD group ( $r = -0.708$ ,  $p = 0.075$ ).

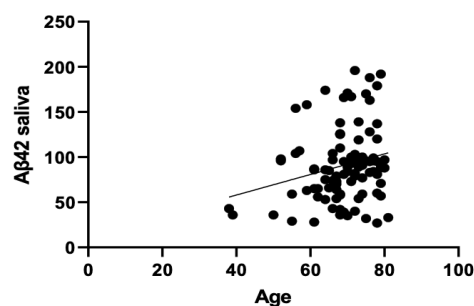

**Supplementary Figure S3.** Correlation between age and salivary Aβ42 concentrations in overall group ( $r = 0.236$ ,  $p = 0.019$ ).

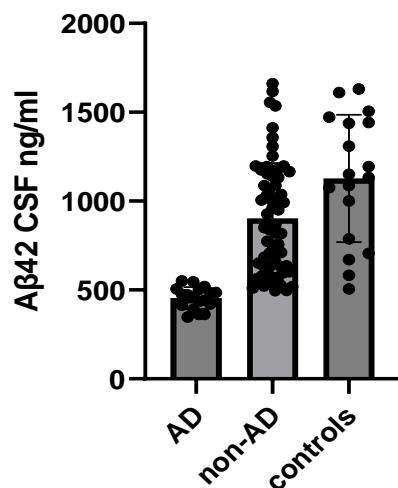

**Supplementary Figure S4.** Comparison of CSF A $\beta$ 42 concentrations between AD, non-AD and controls groups.

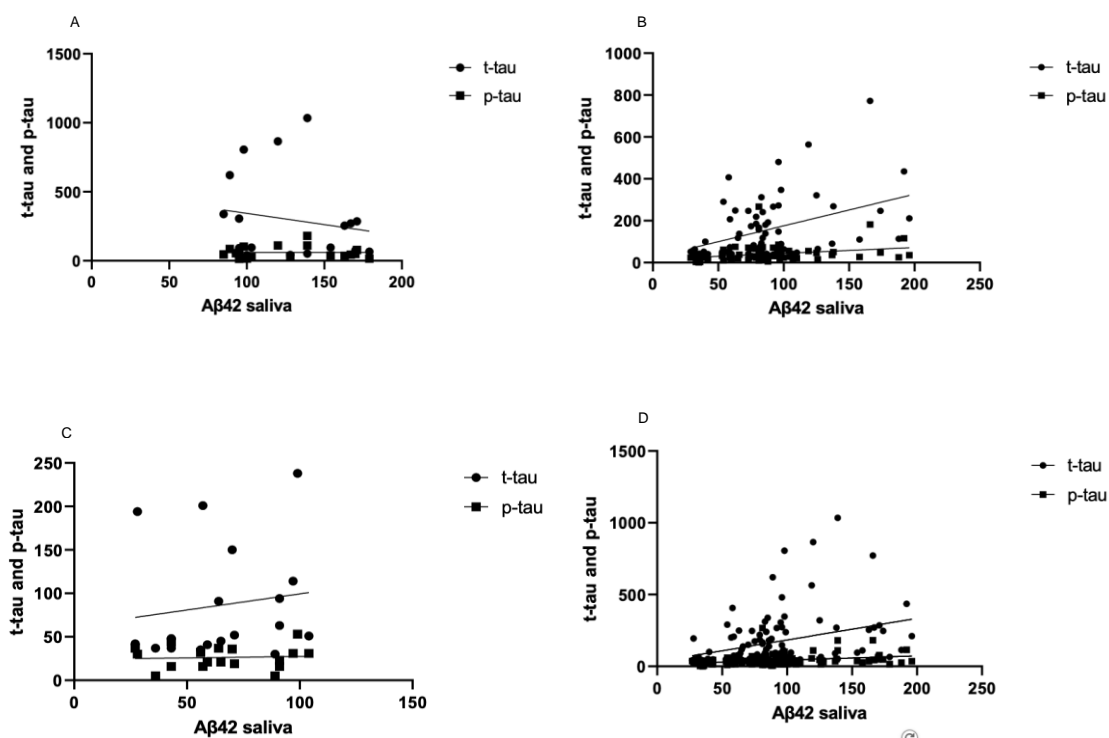

**Supplementary Figure S5.** Correlation between salivary A $\beta$ 42 and t-tau and p-tau in A) AD group (t-tau  $r = -0.172$  ,  $p = 0.496$ ), (p-tau  $r = 0.000$  ,  $p = 0.999$ ), B) non-AD group (t-tau  $r = 0.408$  ,  $p = 0.001$ ), (p-tau  $r = 0.267$  ,  $p = 0.033$ ), C) controls (t-tau  $r = 0.140$  ,  $p = 0.580$ ), D) overall population (t-tau  $r = 0.321$  ,  $p = 0.001$ ), (p-tau  $r = 0.297$  ,  $p = 0.001$ ).

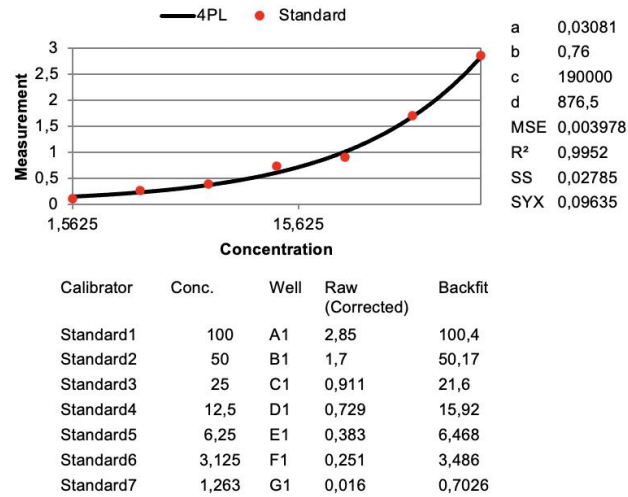

**Supplementary Figure S6.** Example of a calibration curve of A $\beta$ 42 ultrasensitive ELISA kit.
